# Supplementary material
Source: publisher figshare collection journal article supplement (https://diabetesjournals.figshare.com/ndownloader/files/36479841)
Supplement: Supplementary file 1 [file 36479841]

## Supplemental Figure S1. Cohort Construction

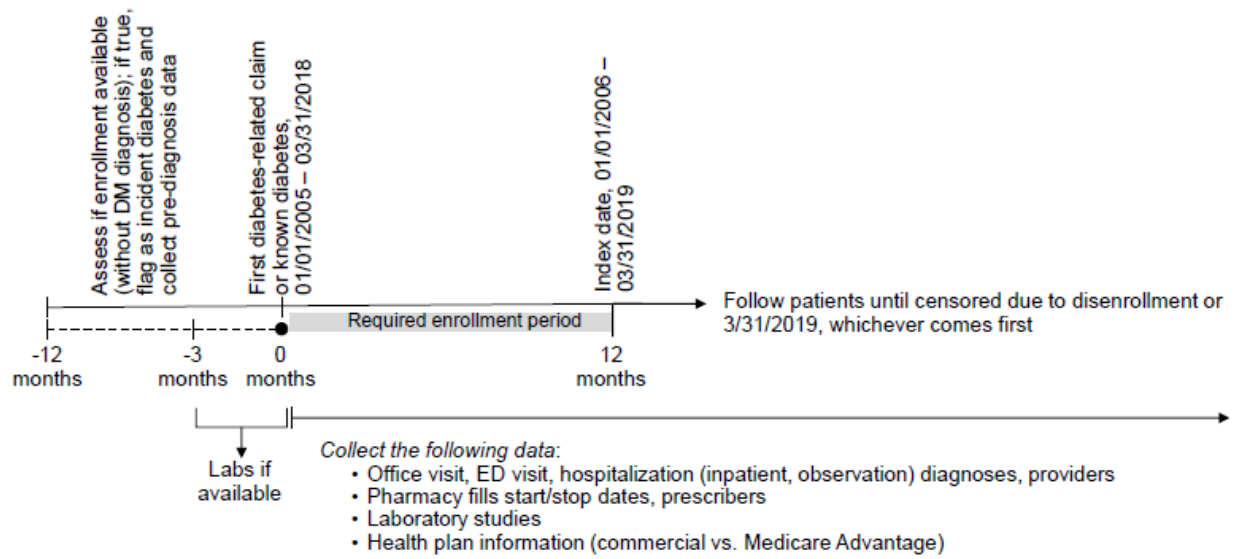

### Supplemental Figure S2. Cohort Construction Flowchart

Diabetes diagnosis, outpatient visit criterion, and outpatient visit criterion were ascertained on the basis of ICD-9 and ICD-10 codes (see Methods). Patients with only gestational diabetes (ICD-9 648.8x, ICD-10 O024.4xx) were not included. Pharmacy claim criteria was having a fill for  $\geq 1$  glucose-lowering medication other than metformin within a 12-month period

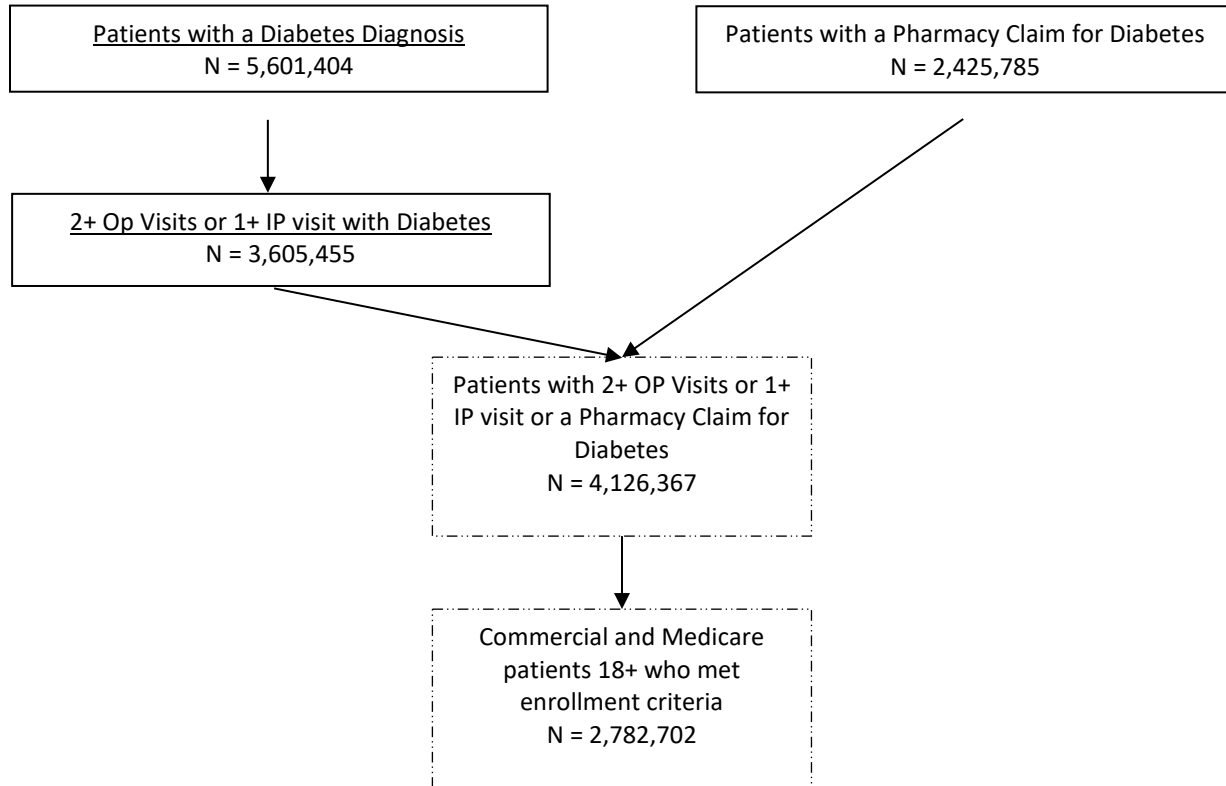

**Supplemental Table S1. Granular Classification Scheme for Medications**

| Medication class                 | Included agents                                                                                                                   |
|----------------------------------|-----------------------------------------------------------------------------------------------------------------------------------|
|                                  | <b>GLUCOSE-LOWERING MEDICATIONS</b>                                                                                               |
| Biguanides                       | Metformin                                                                                                                         |
| Sulfonylureas (SU)               | Glimepiride<br>Glipizide<br>Glyburide                                                                                             |
| Glitazones (TZD)                 | Pioglitazone<br>Rosiglitazone                                                                                                     |
| DPP-4 inhibitors                 | alogliptin<br>linagliptin<br>sitagliptin<br>saxagliptin                                                                           |
| GLP-1 analogs                    | exenatide<br>liraglutide<br>albiglutide<br>dulaglutide<br>semaglutide<br>lixisenatide                                             |
| SGLT-2 inhibitors                | canagliflozin<br>empagliflozin<br>dapagliflozin<br>ertugliflozin                                                                  |
| Glinides                         | nateglinide<br>repaglinide                                                                                                        |
| Amylin analogs                   | pramlintide                                                                                                                       |
| $\alpha$ -Glucosidase inhibitors | acarbose<br>miglitol                                                                                                              |
| Insulin: Bolus                   | <u>Human</u><br>regular<br><br><u>Analog</u><br>aspart<br>lispro<br>glulisine<br>inhaled powder insulin<br>aspart<br>lispro       |
| Insulin: Basal                   | <u>Human</u><br>Neutral Protamine Hagedorn (NPH)<br>isophane<br><br><u>Analog</u><br>determir<br>glargine<br>degludec<br>glargine |
|                                  | <b>LIPID-LOWERING MEDICATIONS</b>                                                                                                 |

|                                   |                                                                                                                                                                                                                                                          |
|-----------------------------------|----------------------------------------------------------------------------------------------------------------------------------------------------------------------------------------------------------------------------------------------------------|
| Statins                           | atorvastatin<br>fluvastatin<br>lovastatin<br>pitavastatin<br>pravastatin<br>rosuvastatin<br>simvastatin                                                                                                                                                  |
| PCSK-9 Inhibitors                 | alirocumab<br>evolocumab                                                                                                                                                                                                                                 |
| Fibrates                          | bezafibrate<br>clofibrate<br>fenofibrate<br>fenofibric Acid<br>gemfibrozil                                                                                                                                                                               |
| Ezetimibe                         | ezetimibe                                                                                                                                                                                                                                                |
| Bile acid sequestrants            | cholestyramine<br>colesevelam<br>colestipol                                                                                                                                                                                                              |
| Nicotinic acid                    | niacin<br>niacinamide                                                                                                                                                                                                                                    |
| Other                             | lomitapide<br>mMipomersen                                                                                                                                                                                                                                |
| Omega-3 fatty acids               | omega-3-acid ethyl esters<br>omega-3-carboxylic acids                                                                                                                                                                                                    |
| Combination tablets               | aspirin/pravastatin sodium<br>ezetimibe/atorvastatin<br>ezetimibe/simvastatin<br>fenofibrate/simvastatin<br>niacin/lovastatin<br>niacin/simvastatin<br>nicotinic acid/laropiprant<br>pravastatin sodium/fenofibrate<br>sitagliptin phosphate/simvastatin |
| <b>CARDIOVASCULAR MEDICATIONS</b> |                                                                                                                                                                                                                                                          |
| ACE inhibitors                    | benazepril<br>captopril<br>enalapril<br>fosinopril<br>lisinopril<br>moexipril<br>perindopril<br>quinapril<br>ramipril<br>trandolapril<br>enalaprilat                                                                                                     |

|                                                |                                                                                                                                                                                                                                                          |
|------------------------------------------------|----------------------------------------------------------------------------------------------------------------------------------------------------------------------------------------------------------------------------------------------------------|
| Angiotensin receptor blockers (ARBs)           | azilsartan<br>candesartan<br>eprosartan<br>irbesartan<br>losartan<br>olmesartan<br>telmisartan<br>valsartan                                                                                                                                              |
| Direct renin inhibitor                         | aliskiren                                                                                                                                                                                                                                                |
| Thiazide diuretics                             | bendroflumethiazide<br>benzthiazide<br>chlorothiazide<br>chlorthalidone<br>cyclothiazide<br>diazoxide<br>hydrochlorothiazide<br>hydroflumethiazide<br>indapamide<br>methyclothiazide<br>metolazone<br>polythiazide<br>quinethazone<br>trichlormethiazide |
| Loop diuretics                                 | bumetanide<br>ethacrynate Sodium<br>ethacrynic Acid<br>furosemide<br>torsemide                                                                                                                                                                           |
| Potassium-sparing diuretics                    | amiloride<br>triamterene                                                                                                                                                                                                                                 |
| Aldosterone antagonist                         | eplerenone<br>spironolactone                                                                                                                                                                                                                             |
| Calcium-channel blockers - dihydropyridines    | amlodipine<br>felodipine<br>isradipine<br>nicardipine<br>nifedipine<br>nisoldipine<br>clevidipine<br>bumetanide<br>ethacrynate Sodium<br>ethacrynic Acid<br>furosemide<br>torsemide                                                                      |
| Calcium-channel blockers - nondihydropyridines | diltiazem<br>verapamil                                                                                                                                                                                                                                   |
| Beta-blockers - cardioselective                | atenolol<br>betaxolol<br>bisoprolol<br>metoprolol tartrate<br>metoprolol succinate                                                                                                                                                                       |

|                                                      |                                                                                                 |
|------------------------------------------------------|-------------------------------------------------------------------------------------------------|
| Beta-blockers -<br>cardioselective +<br>vasodilatory | nevigolol                                                                                       |
| Beta-blockers -<br>noncardioselective                | nadolol<br>propranolol                                                                          |
| Beta-blockers -<br>sympathomimetic activity          | acebutolol<br>penbutolol<br>pindolol<br>timolol                                                 |
| Alpha and Beta-blockers                              | carvedilol<br>labetalol<br>esmolol                                                              |
| Alpha-1 blockers                                     | doxazosin<br>prazosin<br>terazosin<br>alfuzosin                                                 |
| Central antihypertensives                            | clonidine<br>methyldopa<br>guanfacine                                                           |
| Direct vasodilators                                  | hydralazine<br>minoxidil<br>guanethidine<br>tolazoline<br>sodium nitroprusside<br>nitroglycerin |
| Nonselective alpha-blockers                          | phentolamine                                                                                    |
| Dopamine-receptor agonist                            | fenoldopam                                                                                      |

**Supplemental Table S2. Qualifying ICD codes for Diabetes Complications**

Supplemental Table S2 shows the ICD codes used to define diabetes complications (per DCSI definitions), severe hyperglycemic events, and severe hypoglycemic events.

| Category                    | ICD-9 Codes                                                                                                                                                                                                                 | ICD-10 Codes                                                                                                                                                                                                                         |
|-----------------------------|-----------------------------------------------------------------------------------------------------------------------------------------------------------------------------------------------------------------------------|--------------------------------------------------------------------------------------------------------------------------------------------------------------------------------------------------------------------------------------|
| Retinopathy                 | 362.01, 362.03, 362.04, 362.05, 362.06, 362.07, 362.53, 362.81, 362.82, 362.83, 362.02, 379.23, 250.5x, 249.5x, 362.1x, 361.x, 369.x                                                                                        | H359, E08.3x, E09.3x, E10.3x, E11.3x, E13.3x, H35.0x, H35.35x, H35.6x, H35.8x, H33.x, H54.x, H43.1x                                                                                                                                  |
| Nephropathy                 | 593.9, 586, 250.4x, 249.4x, 580.x, 581.x, 582.x, 583.x, 585.x                                                                                                                                                               | E08.21, E08.22, E08.29, E09.21, E09.22, E09.29, E10.21, E10.22, E10.29, E11.21, E11.22, E11.29, E13.21, E13.22, E13.29, N19, N00.x, N03.x, N04.x, N05.x, N18.x                                                                       |
| Cerebrovascular             | 431, 436, 435.x, 433.x, 434.x                                                                                                                                                                                               | I67.81, I61.x, I63.x, I65.x, I66.x, G45.x                                                                                                                                                                                            |
| Cardiovascular              | 429.2, 412, 427.5, 427.1, 411.x, 413.x, 414.x, 410.x, 427.3x, 427.4x, 428.x, 440.x, 441.x                                                                                                                                   | I24.x, I20.x, I25.x, I70.x, I21.x, I22.x, I23.x, I48.x, I46.x, I47.x, I49.x, I50.x, I71.x                                                                                                                                            |
| Peripheral vascular disease | 442.3, 440.21, 443.81, 443.9, 892.1, 040.0, 444.22, 785.4, 250.7x, 249.7, 707.1x                                                                                                                                            | E08.51, E09.51, E10.51, E11.51, E13.51, E08.59, E09.59, E10.59, E11.59, E13.59, E08.621, E09.621, E10.621, E11.621, E13.621, I72.4, I73.89, I73.9, A48.0, I74.3, I96, E08.52, E09.52, E10.52, E11.52, E13.52, I70.21x, S91.3x, L97.x |
| Severe hyperglycemic event  | 250.10, 250.11, 250.12, 250.13, 250.20, 250.21, 250.22, 250.23                                                                                                                                                              | E10.10, E10.11, E11.00, E11.01, E11.10, E11.11, E13.00, E13.01, E13.10, E13.11                                                                                                                                                       |
| Severe hypoglycemic events  | 251.0, 251.1, 251.2, 962.3; and 250.8x, as long as none of the following are also coded during the same encounter:<br>259.8, 272.7, 686.9, 707.8, 707.9, 709.3, 731.8, 681.x, 682.x, 707.1x, 707.2x, 730.0x, 730.1x, 730.2x | E10.641, E10.649, E11.641, E11.649, E13.641, E13.649, E16.0, E16.1, E16.2, T383X1A, T383X1D, T383X1S, T383X2A, T383X2D, T383X2S, T383X3A, T383X3D, T383X3S, T383X4A, T383X4D, T383X4S, T383X5A, T383X5D, T383X5S                     |

### Supplemental Table S3. Properties of Commercial Cohort

Average annual changes represent relative and absolute changes in either proportions or means. Changes are calculated for the period from 2006 to 2018, except for SGLT-2 inhibitors, for which changes are calculated from 2013 to 2018. P-values represent trends from 2006 to 2018, and p-values <0.05 are bolded. Green text indicates an increase, while red text indicates a decrease. All medication data is based on numbers of filled prescriptions. HbA<sub>1c</sub> cutoffs of 7.0% and 8.0% are equivalent to 53 mmol/mol and 64 mmol/mol, respectively.

| Variable                                | p-value          | Avg. Annual Relative Change | Avg. Annual Absolute Change | 2006   | 2007   | 2008   | 2009   | 2010   | 2011   | 2012   | 2013   | 2014   | 2015   | 2016   | 2017   | 2018   |
|-----------------------------------------|------------------|-----------------------------|-----------------------------|--------|--------|--------|--------|--------|--------|--------|--------|--------|--------|--------|--------|--------|
| Cohort size                             |                  |                             |                             | 393046 | 436460 | 451113 | 460069 | 456654 | 459222 | 452232 | 445045 | 400824 | 412659 | 432683 | 440304 | 386845 |
| Glucose-lowering medications            |                  |                             |                             |        |        |        |        |        |        |        |        |        |        |        |        |        |
| Basal Insulin-Analog                    | <b>0.005</b>     | 4.3%                        | 0.4%                        | 10.5%  | 11.8%  | 13.6%  | 14.3%  | 14.7%  | 15.1%  | 15.7%  | 16.3%  | 16.4%  | 16.0%  | 16.0%  | 15.2%  | 16.3%  |
| Basal Insulin-Human                     | <b>&lt;0.001</b> | -5.4%                       | -0.2%                       | 4.0%   | 3.6%   | 3.3%   | 3.0%   | 2.7%   | 2.4%   | 2.2%   | 2.0%   | 1.8%   | 1.6%   | 1.5%   | 1.3%   | 1.2%   |
| Biguanides                              | <b>&lt;0.001</b> | 5.6%                        | 1.9%                        | 34.5%  | 41.9%  | 48.6%  | 49.8%  | 50.6%  | 50.7%  | 50.7%  | 51.3%  | 53.9%  | 54.8%  | 56.6%  | 58.6%  | 59.8%  |
| Bolus Insulin-Analog                    | 0.92             | 0.9%                        | 0.1%                        | 10.6%  | 11.2%  | 12.4%  | 12.7%  | 12.7%  | 12.7%  | 12.8%  | 13.0%  | 12.6%  | 11.9%  | 11.6%  | 11.4%  | 11.9%  |
| Bolus Insulin-Human                     | <b>&lt;0.001</b> | -4.8%                       | -0.2%                       | 3.4%   | 3.1%   | 2.8%   | 2.5%   | 2.3%   | 2.1%   | 1.9%   | 1.7%   | 1.5%   | 1.5%   | 1.4%   | 1.2%   | 1.3%   |
| DPP-4 inhibitors                        | <b>0.047</b>     | 184.8%                      | 0.9%                        | 0.5%   | 5.5%   | 9.2%   | 10.6%  | 11.8%  | 13.7%  | 15.3%  | 14.9%  | 14.2%  | 13.2%  | 12.8%  | 12.5%  | 12.5%  |
| Glitazones                              | <b>0.002</b>     | -5.7%                       | -1.2%                       | 21.8%  | 22.8%  | 19.8%  | 18.4%  | 16.5%  | 13.0%  | 8.0%   | 5.9%   | 5.4%   | 5.2%   | 5.2%   | 5.2%   | 5.6%   |
| GLP-1 agonists                          | <b>&lt;0.001</b> | 17.6%                       | 0.7%                        | 4.2%   | 5.3%   | 5.5%   | 4.6%   | 5.0%   | 5.7%   | 6.4%   | 6.7%   | 6.7%   | 7.7%   | 9.2%   | 11.1%  | 13.8%  |
| SGLT2 inhibitors                        | <b>0.002</b>     | 177.8%                      | 2.1%                        | 0.0%   | 0.0%   | 0.0%   | 0.0%   | 0.0%   | 0.0%   | 0.0%   | 1.2%   | 5.1%   | 9.0%   | 10.6%  | 12.1%  | 13.8%  |
| Sulfonylureas                           | 0.10             | 0.2%                        | 0.0%                        | 22.1%  | 25.0%  | 27.3%  | 26.7%  | 26.0%  | 25.2%  | 24.4%  | 24.0%  | 23.2%  | 22.6%  | 22.5%  | 22.4%  | 22.6%  |
| Classes of glucose-lowering medications |                  |                             |                             |        |        |        |        |        |        |        |        |        |        |        |        |        |
| 0 Unique Classes                        | <b>0.01</b>      | -3.0%                       | -1.2%                       | 38.4%  | 33.7%  | 27.7%  | 27.5%  | 27.4%  | 28.0%  | 28.7%  | 28.8%  | 27.8%  | 27.4%  | 25.8%  | 24.3%  | 23.3%  |
| 1 Unique Class                          | <b>0.001</b>     | 0.7%                        | 0.2%                        | 26.9%  | 25.5%  | 27.4%  | 27.8%  | 28.3%  | 28.6%  | 29.1%  | 29.3%  | 29.7%  | 29.6%  | 30.3%  | 31.1%  | 29.4%  |





|                                                     |       |       |       |                |                |                |                |                |                |                |                |                |                |                |                |                |
|-----------------------------------------------------|-------|-------|-------|----------------|----------------|----------------|----------------|----------------|----------------|----------------|----------------|----------------|----------------|----------------|----------------|----------------|
| Mean (SD)<br>Classes                                | 0.81  | 2.8%  | 0.014 | 0.49<br>(0.73) | 0.61<br>(0.80) | 0.70<br>(0.81) | 0.72<br>(0.79) | 0.72<br>(0.78) | 0.71<br>(0.75) | 0.68<br>(0.72) | 0.66<br>(0.70) | 0.65<br>(0.67) | 0.63<br>(0.65) | 0.63<br>(0.64) | 0.64<br>(0.63) | 0.67<br>(0.63) |
| Total # of<br>(any)<br>medication<br>classes        |       |       |       |                |                |                |                |                |                |                |                |                |                |                |                |                |
| 0 Medication<br>Classes                             | 0.09  | -3.3% | -0.3% | 8.7%           | 13.0%          | 7.1%           | 6.2%           | 5.6%           | 5.1%           | 5.2%           | 5.4%           | 6.0%           | 7.2%           | 6.5%           | 5.6%           | 5.0%           |
| 1 Unique<br>Class                                   | 0.06  | -4.5% | -0.3% | 7.6%           | 4.3%           | 3.7%           | 3.6%           | 3.7%           | 3.7%           | 3.8%           | 3.9%           | 3.9%           | 3.7%           | 3.7%           | 3.5%           | 3.1%           |
| 2 Unique<br>Classes                                 | 0.01  | -4.2% | -0.4% | 10.1%          | 6.4%           | 5.7%           | 5.6%           | 5.6%           | 5.6%           | 5.7%           | 5.7%           | 5.8%           | 5.5%           | 5.4%           | 5.2%           | 4.6%           |
| 3 Unique<br>Classes                                 | 0.02  | -3.3% | -0.4% | 11.0%          | 8.0%           | 7.4%           | 7.2%           | 7.1%           | 7.2%           | 7.3%           | 7.3%           | 7.4%           | 7.2%           | 7.1%           | 7.0%           | 6.4%           |
| 4 Unique<br>Classes                                 | 0.02  | -2.1% | -0.2% | 11.2%          | 8.9%           | 8.8%           | 8.5%           | 8.6%           | 8.7%           | 8.7%           | 8.7%           | 8.8%           | 8.5%           | 8.5%           | 8.4%           | 8.1%           |
| 5 Unique<br>Classes                                 | 0.92  | -0.9% | -0.1% | 10.5%          | 9.3%           | 9.5%           | 9.4%           | 9.3%           | 9.4%           | 9.5%           | 9.6%           | 9.6%           | 9.5%           | 9.6%           | 9.5%           | 9.3%           |
| 6 Unique<br>Classes                                 | 0.002 | 0.5%  | 0.0%  | 9.3%           | 9.1%           | 9.5%           | 9.6%           | 9.6%           | 9.6%           | 9.8%           | 9.8%           | 9.7%           | 9.7%           | 9.8%           | 9.8%           | 9.8%           |
| 7 Unique<br>Classes                                 | 0.001 | 1.9%  | 0.2%  | 7.9%           | 8.4%           | 9.2%           | 9.2%           | 9.2%           | 9.4%           | 9.4%           | 9.3%           | 9.4%           | 9.4%           | 9.5%           | 9.7%           | 9.8%           |
| 8 Unique<br>Classes                                 | 0.01  | 3.4%  | 0.2%  | 6.3%           | 7.4%           | 8.2%           | 8.5%           | 8.5%           | 8.6%           | 8.6%           | 8.6%           | 8.5%           | 8.4%           | 8.6%           | 8.8%           | 9.1%           |
| 9 Unique<br>Classes                                 | 0.02  | 4.8%  | 0.2%  | 4.9%           | 6.3%           | 7.2%           | 7.4%           | 7.5%           | 7.5%           | 7.5%           | 7.4%           | 7.3%           | 7.3%           | 7.4%           | 7.5%           | 7.9%           |
| >= 10<br>Unique<br>Classes                          | 0.13  | 8.8%  | 1.1%  | 12.6%          | 19.1%          | 23.7%          | 24.8%          | 25.4%          | 25.3%          | 24.6%          | 24.3%          | 23.6%          | 23.7%          | 24.1%          | 24.9%          | 26.9%          |
| Mean (SD)<br>Any Class                              | 0.07  | 3.0%  | 0.16  | 5.15<br>(3.68) | 5.88<br>(4.22) | 6.67<br>(4.20) | 6.84<br>(4.20) | 6.92<br>(4.21) | 6.94<br>(4.18) | 6.87<br>(4.14) | 6.81<br>(4.11) | 6.72<br>(4.12) | 6.68<br>(4.15) | 6.77<br>(4.15) | 6.91<br>(4.12) | 7.18<br>(4.14) |
| Actively<br>managed<br>DCSI<br>categories-<br>Count |       |       |       |                |                |                |                |                |                |                |                |                |                |                |                |                |
| No DCSI<br>Complication                             | 0.26  | 0.1%  | 0.0%  | 66.7%          | 67.5%          | 68.0%          | 68.1%          | 68.3%          | 68.7%          | 68.9%          | 68.6%          | 69.4%          | 68.0%          | 68.3%          | 68.3%          | 67.2%          |
| 1 DCSI<br>Complication                              | 0.17  | -0.2% | 0.0%  | 22.6%          | 22.1%          | 21.9%          | 21.7%          | 21.6%          | 21.3%          | 21.2%          | 21.4%          | 21.0%          | 21.6%          | 21.6%          | 21.7%          | 22.1%          |
| 2 DCSI<br>Complication                              | 0.66  | 0.2%  | 0.0%  | 7.1%           | 6.9%           | 6.7%           | 6.8%           | 6.7%           | 6.7%           | 6.6%           | 6.7%           | 6.5%           | 7.0%           | 6.9%           | 6.9%           | 7.3%           |
| 3 DCSI<br>Complication                              | 0.23  | -0.1% | 0.0%  | 2.5%           | 2.3%           | 2.3%           | 2.3%           | 2.3%           | 2.2%           | 2.2%           | 2.2%           | 2.1%           | 2.3%           | 2.2%           | 2.2%           | 2.4%           |

|                                                            |                  |              |               |                |                |                |                |                |                |                |                |                |                |                |                |                |
|------------------------------------------------------------|------------------|--------------|---------------|----------------|----------------|----------------|----------------|----------------|----------------|----------------|----------------|----------------|----------------|----------------|----------------|----------------|
| 4 DCSI Complication                                        | <b>0.02</b>      | <b>-0.8%</b> | <b>0.0%</b>   | 0.9%           | 0.8%           | 0.8%           | 0.8%           | 0.8%           | 0.8%           | 0.8%           | 0.8%           | 0.7%           | 0.8%           | 0.7%           | 0.7%           | 0.8%           |
| >= 5 DCSI Complication                                     | <b>&lt;0.001</b> | <b>-2.3%</b> | <b>0.0%</b>   | 0.4%           | 0.4%           | 0.3%           | 0.4%           | 0.3%           | 0.3%           | 0.3%           | 0.3%           | 0.3%           | 0.3%           | 0.3%           | 0.3%           | 0.3%           |
| Mean (SD) DCSI                                             | 0.14             | <b>-0.2%</b> | <b>-0.001</b> | 0.50<br>(0.86) | 0.48<br>(0.85) | 0.47<br>(0.83) | 0.47<br>(0.84) | 0.47<br>(0.83) | 0.46<br>(0.83) | 0.46<br>(0.82) | 0.46<br>(0.82) | 0.45<br>(0.81) | 0.47<br>(0.83) | 0.46<br>(0.82) | 0.46<br>(0.81) | 0.49<br>(0.84) |
| <b>Actively managed DCSI types and other complications</b> |                  |              |               |                |                |                |                |                |                |                |                |                |                |                |                |                |
| Cardiovascular Disease                                     | <b>0.01</b>      | <b>-0.7%</b> | <b>-0.1%</b>  | 15.34%         | 14.88%         | 14.54%         | 14.44%         | 14.15%         | 13.78%         | 13.45%         | 13.25%         | 12.46%         | 12.67%         | 13.26%         | 13.39%         | 13.96%         |
| Cerebro Disease                                            | <b>0.04</b>      | <b>-0.5%</b> | <b>0.0%</b>   | 2.56%          | 2.53%          | 2.56%          | 2.60%          | 2.61%          | 2.62%          | 2.59%          | 2.56%          | 2.35%          | 2.38%          | 2.23%          | 2.31%          | 2.41%          |
| Nephropathy                                                | <b>&lt;0.001</b> | <b>3.3%</b>  | <b>0.2%</b>   | 6.27%          | 6.33%          | 6.40%          | 6.81%          | 7.03%          | 7.10%          | 7.06%          | 7.29%          | 7.18%          | 7.73%          | 8.03%          | 8.34%          | 8.98%          |
| Neuropathy                                                 | <b>0.01</b>      | <b>0.9%</b>  | <b>0.1%</b>   | 11.23%         | 10.96%         | 10.83%         | 10.83%         | 10.81%         | 10.75%         | 10.93%         | 11.38%         | 11.33%         | 12.25%         | 12.16%         | 12.21%         | 12.58%         |
| Peripheral Vascular Disease                                | 0.72             | <b>1.7%</b>  | <b>0.1%</b>   | 4.39%          | 4.20%          | 4.04%          | 4.06%          | 4.02%          | 3.93%          | 3.86%          | 3.82%          | 3.67%          | 3.87%          | 4.39%          | 4.76%          | 5.35%          |
| Retinopathy                                                | <b>&lt;0.001</b> | <b>-4.1%</b> | <b>-0.2%</b>  | 5.88%          | 5.51%          | 5.13%          | 4.94%          | 4.62%          | 4.39%          | 4.27%          | 4.28%          | 4.09%          | 4.17%          | 3.93%          | 2.70%          | 2.72%          |
| Severe Hyperglycemia                                       | 0.10             | <b>-2.1%</b> | <b>0.0%</b>   | 1.12%          | 0.99%          | 0.96%          | 0.85%          | 0.83%          | 0.81%          | 0.77%          | 0.76%          | 0.77%          | 0.82%          | 0.85%          | 0.93%          | 0.82%          |
| Severe Hypoglycemia                                        | 0.11             | <b>-3.1%</b> | <b>-0.1%</b>  | 2.88%          | 2.78%          | 2.75%          | 2.70%          | 2.71%          | 2.73%          | 2.70%          | 2.75%          | 2.88%          | 3.32%          | 1.50%          | 1.57%          | 1.72%          |
| <b>Actively Managed CCS Health Conditions</b>              |                  |              |               |                |                |                |                |                |                |                |                |                |                |                |                |                |
| 1 CCS Category                                             | <b>0.01</b>      | <b>1.3%</b>  | <b>0.1%</b>   | 9.01%          | 9.81%          | 9.60%          | 9.61%          | 9.66%          | 9.55%          | 9.57%          | 9.71%          | 10.96%         | 11.01%         | 11.33%         | 10.48%         | 10.55%         |
| 2 CCS Categories                                           | <b>&lt;0.001</b> | <b>-2.3%</b> | <b>-0.1%</b>  | 4.66%          | 4.40%          | 4.13%          | 3.86%          | 3.79%          | 3.76%          | 3.62%          | 3.49%          | 3.64%          | 3.31%          | 3.30%          | 3.29%          | 3.26%          |
| 3 CCS Categories                                           | <b>&lt;0.001</b> | <b>-2.2%</b> | <b>-0.2%</b>  | 6.98%          | 6.67%          | 6.43%          | 6.20%          | 6.02%          | 5.92%          | 5.74%          | 5.54%          | 5.62%          | 5.09%          | 5.26%          | 5.13%          | 4.96%          |
| 4 CCS Categories                                           | <b>&lt;0.001</b> | <b>-1.8%</b> | <b>-0.2%</b>  | 9.03%          | 8.79%          | 8.62%          | 8.48%          | 8.45%          | 8.46%          | 8.12%          | 8.05%          | 8.12%          | 7.37%          | 7.27%          | 7.19%          | 6.92%          |
| 5 CCS Categories                                           | <b>0.003</b>     | <b>-0.5%</b> | <b>0.0%</b>   | 8.61%          | 8.45%          | 8.37%          | 8.19%          | 8.35%          | 8.31%          | 8.21%          | 8.22%          | 8.31%          | 7.96%          | 8.10%          | 8.14%          | 8.02%          |
| 6 CCS Categories                                           | <b>&lt;0.001</b> | <b>-0.8%</b> | <b>-0.1%</b>  | 8.39%          | 8.24%          | 8.17%          | 8.22%          | 8.15%          | 8.15%          | 8.12%          | 7.96%          | 7.92%          | 7.71%          | 7.70%          | 7.67%          | 7.50%          |

|                                       |        |        |        |             |             |             |             |             |             |             |             |             |             |             |             |             |
|---------------------------------------|--------|--------|--------|-------------|-------------|-------------|-------------|-------------|-------------|-------------|-------------|-------------|-------------|-------------|-------------|-------------|
| 7 CCS Categories                      | 0.01   | -0.4%  | 0.0%   | 7.51%       | 7.50%       | 7.57%       | 7.52%       | 7.50%       | 7.50%       | 7.51%       | 7.53%       | 7.43%       | 7.38%       | 7.35%       | 7.42%       | 7.16%       |
| 8 CCS Categories                      | 0.02   | -0.1%  | 0.0%   | 6.76%       | 6.72%       | 6.76%       | 6.71%       | 6.71%       | 6.81%       | 6.80%       | 6.71%       | 6.69%       | 6.72%       | 6.69%       | 6.69%       | 6.67%       |
| 9 CCS Categories                      | 0.004  | 0.4%   | 0.0%   | 5.76%       | 5.80%       | 5.85%       | 5.91%       | 5.90%       | 5.97%       | 5.93%       | 5.92%       | 5.87%       | 5.94%       | 5.93%       | 6.02%       | 6.03%       |
| >=10 CCS Categories                   | 0.001  | 1.3%   | 0.4%   | 33.28 %     | 33.61 %     | 34.50 %     | 35.29 %     | 35.48 %     | 35.57 %     | 36.37 %     | 36.87 %     | 35.45 %     | 37.50 %     | 37.07 %     | 37.97 %     | 38.91%      |
| Mean (SD) CCS Categories              | 0.002  | 0.7%   | 0.060  | 8.59 (6.90) | 8.63 (6.96) | 8.77 (7.03) | 8.89 (7.10) | 8.91 (7.09) | 8.94 (7.09) | 9.04 (7.12) | 9.09 (7.13) | 8.86 (7.08) | 9.17 (7.27) | 9.07 (7.19) | 9.23 (7.22) | 9.37 (7.33) |
| Health Care Utilization               |        |        |        |             |             |             |             |             |             |             |             |             |             |             |             |             |
| Mean (SD) Ambulatory visits           | 0.001  | -0.8%  | -0.052 | 6.86 (6.15) | 6.79 (6.20) | 6.73 (6.17) | 6.75 (6.23) | 6.62 (6.11) | 6.51 (6.06) | 6.43 (6.01) | 6.48 (6.18) | 6.23 (6.02) | 6.17 (5.97) | 6.15 (5.97) | 6.16 (5.95) | 6.19 (6.04) |
| Mean (SD) Emergency Department Visits | 0.001  | 0.9%   | 0.002  | 0.26 (0.87) | 0.26 (0.96) | 0.26 (0.88) | 0.26 (0.91) | 0.26 (1.16) | 0.27 (1.05) | 0.27 (0.90) | 0.27 (0.95) | 0.28 (1.0)  | 0.29 (1.12) | 0.30 (1.14) | 0.3 (0.93)  | 0.29 (0.93) |
| Mean (SD) Hospitalizations            | <0.001 | -3.2%  | -0.006 | 0.19 (0.60) | 0.18 (0.58) | 0.17 (0.57) | 0.17 (0.57) | 0.16 (0.55) | 0.15 (0.54) | 0.14 (0.52) | 0.14 (0.50) | 0.13 (0.48) | 0.13 (0.47) | 0.12 (0.47) | 0.12 (0.46) | 0.11 (0.45) |
| HbA <sub>1c</sub>                     |        |        |        |             |             |             |             |             |             |             |             |             |             |             |             |             |
| Mean (SD) HbA <sub>1c</sub>           | 0.09   | -0.07% | -0.54% | 7.47 (1.72) | 7.36 (1.65) | 7.37 (1.66) | 7.47 (1.69) | 7.48 (1.68) | 7.48 (1.75) | 7.45 (1.72) | 7.49 (1.73) | 7.57 (1.76) | 7.59 (1.75) | 7.56 (1.73) | 7.48 (1.72) | 7.40 (1.71) |
| HbA <sub>1c</sub> < 7.0%              | 0.13   | 0.25%  | 0.12%  | 48.9%       | 53.3%       | 53.0%       | 50.2%       | 49.2%       | 51.2%       | 51.2%       | 50.0%       | 47.3%       | 46.8%       | 47.1%       | 49.2%       | 50.5%       |
| HbA <sub>1c</sub> ≥ 8.0%              | 0.04   | -0.05% | -0.02% | 28.0%       | 25.1%       | 26.0%       | 27.4%       | 27.8%       | 27.4%       | 27.3%       | 28.8%       | 30.4%       | 30.5%       | 30.1%       | 29.0%       | 27.8%       |

### Supplemental Table S4. Properties of Medicare Advantage Cohort

Average annual changes represent relative and absolute changes in either proportions or means. Changes are calculated for the period from 2006 to 2018, except for SGLT-2 inhibitors, for which changes are calculated from 2013 to 2018. P-values represent trends from 2006 to 2018, and p-values <0.05 are bolded. Green text indicates an increase, while red text indicates a decrease. All medication data is based on numbers of filled prescriptions. HbA<sub>1c</sub> cutoffs of 7.0% and 8.0% are equivalent to 53 mmol/mol and 64 mmol/mol, respectively.

| Variable                                         | p-value          | Avg. Annual Relative Change | Avg. Annual Absolute Change | 2006  | 2007  | 2008   | 2009   | 2010   | 2011   | 2012   | 2013   | 2014   | 2015   | 2016   | 2017   | 2018   |
|--------------------------------------------------|------------------|-----------------------------|-----------------------------|-------|-------|--------|--------|--------|--------|--------|--------|--------|--------|--------|--------|--------|
| Cohort size                                      |                  |                             |                             | 65583 | 97816 | 133230 | 184439 | 242461 | 291044 | 363848 | 410773 | 431868 | 465814 | 656531 | 819285 | 797151 |
| Glucose-lowering medications, individual classes |                  |                             |                             |       |       |        |        |        |        |        |        |        |        |        |        |        |
| Basal Insulin-Analog                             | <b>&lt;0.001</b> | 7.0%                        | 0.7%                        | 10.4% | 12.0% | 13.9%  | 15.3%  | 16.0%  | 16.9%  | 17.5%  | 18.3%  | 19.1%  | 18.7%  | 19.7%  | 19.4%  | 19.8%  |
| Basal Insulin-Human                              | <b>0.049</b>     | -6.3%                       | -0.8%                       | 11.9% | 9.9%  | 8.5%   | 7.0%   | 5.9%   | 5.1%   | 4.3%   | 3.7%   | 3.3%   | 3.0%   | 2.9%   | 2.4%   | 2.2%   |
| Biguanides                                       | <b>&lt;0.001</b> | 2.5%                        | 1.0%                        | 38.5% | 38.7% | 39.5%  | 42.1%  | 43.8%  | 44.6%  | 45.0%  | 45.8%  | 47.2%  | 47.5%  | 49.2%  | 50.4%  | 51.0%  |
| Bolus Insulin-Analog                             | 0.44             | 6.2%                        | 0.4%                        | 6.6%  | 7.5%  | 9.0%   | 10.1%  | 10.8%  | 11.4%  | 11.8%  | 12.2%  | 12.7%  | 12.4%  | 12.4%  | 12.0%  | 11.9%  |
| Bolus Insulin-Human                              | 0.46             | -6.2%                       | -0.8%                       | 12.3% | 11.0% | 9.3%   | 7.8%   | 6.6%   | 5.6%   | 4.6%   | 3.9%   | 3.4%   | 3.0%   | 3.0%   | 2.6%   | 2.3%   |
| DPP-4 inhibitors                                 | <b>0.557</b>     | 492.7%                      | 0.9%                        | 0.2%  | 2.9%  | 4.3%   | 5.1%   | 6.6%   | 8.6%   | 10.8%  | 11.3%  | 12.1%  | 11.5%  | 12.0%  | 12.2%  | 12.4%  |
| Glitazones                                       | <b>0.034</b>     | -5.8%                       | -1.3%                       | 21.7% | 19.6% | 14.9%  | 13.1%  | 11.8%  | 9.0%   | 5.6%   | 4.2%   | 4.1%   | 4.2%   | 4.7%   | 4.9%   | 5.3%   |
| GLP-1 agonists                                   | <b>&lt;0.001</b> | 32.6%                       | 0.4%                        | 1.2%  | 1.1%  | 1.1%   | 1.2%   | 1.3%   | 1.5%   | 1.9%   | 2.2%   | 2.5%   | 2.7%   | 3.6%   | 4.7%   | 6.0%   |
| SGLT2 inhibitors                                 | <b>0.002</b>     | 450.0%                      | 0.7%                        | 0.0%  | 0.0%  | 0.0%   | 0.0%   | 0.0%   | 0.0%   | 0.0%   | 0.2%   | 0.9%   | 2.0%   | 3.0%   | 3.9%   | 4.5%   |
| Sulfonylureas                                    | <b>&lt;0.001</b> | -3.2%                       | -1.5%                       | 45.9% | 40.9% | 38.1%  | 36.7%  | 35.2%  | 33.8%  | 32.2%  | 30.6%  | 28.9%  | 27.2%  | 27.4%  | 26.6%  | 26.6%  |
| Glucose-lowering medications, total classes      |                  |                             |                             |       |       |        |        |        |        |        |        |        |        |        |        |        |
| 0 Unique Classes                                 | <b>0.50</b>      | 2.1%                        | 0.4%                        | 20.4% | 25.4% | 27.1%  | 26.9%  | 27.0%  | 27.0%  | 27.7%  | 28.2%  | 27.7%  | 28.7%  | 26.5%  | 26.3%  | 26.0%  |
| 1 Unique Class                                   | <b>0.02</b>      | -0.1%                       | 0.0%                        | 32.3% | 29.2% | 29.2%  | 29.5%  | 30.0%  | 30.8%  | 31.1%  | 31.2%  | 31.4%  | 31.7%  | 32.3%  | 32.5%  | 31.9%  |

[illegible]

| medication classes                     |                  |       |       |             |             |             |             |             |             |             |             |             |             |             |             |             |
|----------------------------------------|------------------|-------|-------|-------------|-------------|-------------|-------------|-------------|-------------|-------------|-------------|-------------|-------------|-------------|-------------|-------------|
| 0 Medication Classes                   | <b>0.004</b>     | -4.3% | -0.2% | 4.1%        | 5.5%        | 5.9%        | 5.1%        | 4.1%        | 2.2%        | 2.1%        | 2.0%        | 2.1%        | 2.2%        | 2.1%        | 1.8%        | 1.8%        |
| 1 Unique Class                         | <b>0.01</b>      | -2.9% | -0.1% | 2.1%        | 1.9%        | 2.0%        | 1.8%        | 1.8%        | 1.8%        | 1.9%        | 1.8%        | 1.8%        | 1.9%        | 1.7%        | 1.7%        | 1.3%        |
| 2 Unique Classes                       | <b>0.003</b>     | -2.8% | -0.1% | 3.1%        | 2.9%        | 2.8%        | 2.8%        | 2.7%        | 2.7%        | 2.7%        | 2.6%        | 2.6%        | 2.8%        | 2.5%        | 2.5%        | 2.0%        |
| 3 Unique Classes                       | <b>0.03</b>      | -2.2% | -0.1% | 4.4%        | 3.9%        | 3.9%        | 3.8%        | 3.6%        | 3.7%        | 3.8%        | 3.7%        | 3.8%        | 3.9%        | 3.6%        | 3.5%        | 3.1%        |
| 4 Unique Classes                       | <b>0.13</b>      | -1.9% | -0.1% | 5.7%        | 5.1%        | 5.3%        | 5.0%        | 4.9%        | 5.0%        | 5.2%        | 5.1%        | 5.1%        | 5.3%        | 5.0%        | 4.8%        | 4.3%        |
| 5 Unique Classes                       | 0.49             | -1.6% | -0.1% | 7.3%        | 6.3%        | 6.4%        | 6.4%        | 6.2%        | 6.3%        | 6.5%        | 6.4%        | 6.5%        | 6.7%        | 6.4%        | 6.2%        | 5.8%        |
| 6 Unique Classes                       | <b>0.532</b>     | -1.2% | -0.1% | 8.4%        | 7.6%        | 7.6%        | 7.5%        | 7.4%        | 7.6%        | 7.7%        | 7.7%        | 7.7%        | 7.9%        | 7.7%        | 7.4%        | 7.1%        |
| 7 Unique Classes                       | <b>0.820</b>     | -0.7% | -0.1% | 9.1%        | 8.4%        | 8.3%        | 8.3%        | 8.3%        | 8.3%        | 8.6%        | 8.7%        | 8.6%        | 8.8%        | 8.6%        | 8.4%        | 8.2%        |
| 8 Unique Classes                       | <b>0.28</b>      | -0.3% | 0.0%  | 9.3%        | 8.6%        | 8.7%        | 8.7%        | 8.7%        | 8.8%        | 9.0%        | 9.0%        | 9.0%        | 9.2%        | 9.0%        | 8.9%        | 8.9%        |
| 9 Unique Classes                       | <b>0.09</b>      | 0.1%  | 0.0%  | 9.0%        | 8.6%        | 8.4%        | 8.6%        | 8.7%        | 9.0%        | 8.9%        | 9.0%        | 8.9%        | 8.9%        | 9.0%        | 8.8%        | 9.0%        |
| >= 10 Unique Classes                   | <b>0.004</b>     | 2.2%  | 0.8%  | 37.6%       | 41.3%       | 40.8%       | 42.1%       | 43.6%       | 44.6%       | 43.6%       | 44.0%       | 43.8%       | 42.5%       | 44.4%       | 46.0%       | 48.5%       |
| Mean (SD) Any Class                    | <b>0.004</b>     | 1.1%  | 0.10  | 8.31 (4.38) | 8.60 (4.67) | 8.55 (4.71) | 8.71 (4.66) | 8.91 (4.62) | 9.12 (4.52) | 9.01 (4.45) | 9.05 (4.43) | 9.04 (4.46) | 8.89 (4.40) | 9.10 (4.45) | 9.28 (4.49) | 9.55 (4.47) |
| Actively managed DCSI categories-Count |                  |       |       |             |             |             |             |             |             |             |             |             |             |             |             |             |
| No DCSI Complication                   | <b>0.001</b>     | -1.1% | -0.5% | 40.9%       | 40.6%       | 40.8%       | 40.0%       | 39.8%       | 40.0%       | 39.7%       | 39.3%       | 40.0%       | 39.0%       | 38.3%       | 36.2%       | 34.9%       |
| 1 DCSI Complication                    | 0.13             | -0.2% | -0.1% | 29.5%       | 28.9%       | 28.8%       | 29.1%       | 29.5%       | 29.5%       | 29.5%       | 29.4%       | 28.7%       | 28.3%       | 28.8%       | 29.0%       | 28.8%       |
| 2 DCSI Complication                    | <b>0.001</b>     | 1.4%  | 0.2%  | 16.5%       | 16.8%       | 16.8%       | 17.1%       | 17.2%       | 17.1%       | 17.2%       | 17.4%       | 17.2%       | 17.7%       | 18.2%       | 18.9%       | 19.5%       |
| 3 DCSI Complication                    | <b>&lt;0.001</b> | 2.2%  | 0.2%  | 8.2%        | 8.4%        | 8.4%        | 8.4%        | 8.5%        | 8.4%        | 8.4%        | 8.6%        | 8.7%        | 9.2%        | 9.2%        | 9.9%        | 10.5%       |
| 4 DCSI Complication                    | <b>0.005</b>     | 2.7%  | 0.1%  | 3.4%        | 3.6%        | 3.6%        | 3.7%        | 3.5%        | 3.5%        | 3.6%        | 3.7%        | 3.8%        | 4.0%        | 3.9%        | 4.3%        | 4.6%        |
| >= 5 DCSI Complication                 | 0.26             | 1.3%  | 0.0%  | 1.5%        | 1.7%        | 1.7%        | 1.7%        | 1.6%        | 1.5%        | 1.6%        | 1.6%        | 1.7%        | 1.8%        | 1.6%        | 1.7%        | 1.8%        |
| Mean (SD) DCSI                         | <b>0.002</b>     | 1.3%  | 0.014 | 1.09 (1.22) | 1.11 (1.24) | 1.11 (1.24) | 1.13 (1.25) | 1.12 (1.23) | 1.11 (1.22) | 1.12 (1.23) | 1.13 (1.23) | 1.13 (1.25) | 1.17 (1.27) | 1.17 (1.24) | 1.22 (1.26) | 1.27 (1.27) |

|                                                     |        |       |       |        |        |        |        |        |        |        |        |        |        |        |        |        |
|-----------------------------------------------------|--------|-------|-------|--------|--------|--------|--------|--------|--------|--------|--------|--------|--------|--------|--------|--------|
| Actively managed DCSI types and other complications |        |       |       |        |        |        |        |        |        |        |        |        |        |        |        |        |
| Cardiovascular Disease                              | 0.60   | 0.4%  | 0.1%  | 38.97% | 39.26% | 38.78% | 38.97% | 38.75% | 38.37% | 38.36% | 37.78% | 36.49% | 36.80% | 37.87% | 39.56% | 40.80% |
| Cerebro Disease                                     | 0.01   | -0.3% | 0.0%  | 9.59%  | 9.97%  | 10.01% | 9.97%  | 10.09% | 9.79%  | 9.89%  | 9.75%  | 9.10%  | 8.86%  | 8.46%  | 8.97%  | 9.26%  |
| Nephropathy                                         | <0.001 | 5.3%  | 0.9%  | 16.30% | 18.31% | 18.48% | 19.28% | 19.97% | 20.28% | 20.47% | 21.24% | 22.08% | 23.36% | 24.00% | 25.97% | 27.43% |
| Neuropathy                                          | <0.001 | 3.9%  | 0.6%  | 16.52% | 16.84% | 17.29% | 18.27% | 18.51% | 18.73% | 19.25% | 20.24% | 20.74% | 21.97% | 23.02% | 24.50% | 24.85% |
| Peripheral Vascular Disease                         | 0.16   | 2.1%  | 0.3%  | 12.11% | 12.17% | 12.13% | 12.38% | 11.96% | 11.76% | 11.91% | 11.92% | 11.95% | 12.21% | 13.10% | 14.32% | 15.39% |
| Retinopathy                                         | 0.003  | -3.6% | -0.3% | 9.22%  | 8.53%  | 7.97%  | 7.83%  | 6.93%  | 6.46%  | 6.57%  | 6.70%  | 6.64%  | 7.03%  | 6.33%  | 4.76%  | 4.91%  |
| Severe Hyperglycemia                                | 0.26   | -0.8% | 0.0%  | 1.00%  | 1.04%  | 1.05%  | 0.93%  | 0.91%  | 0.95%  | 1.01%  | 0.94%  | 0.96%  | 0.94%  | 0.95%  | 1.04%  | 0.89%  |
| Severe Hypoglycemia                                 | 0.08   | -2.6% | -0.1% | 4.99%  | 4.94%  | 5.01%  | 4.91%  | 4.76%  | 4.50%  | 4.45%  | 4.45%  | 5.18%  | 5.58%  | 3.06%  | 3.19%  | 3.28%  |
| Actively Managed CCS Health Conditions              |        |       |       |        |        |        |        |        |        |        |        |        |        |        |        |        |
| 1 CCS Category                                      | 0.21   | -1.8% | -0.1% | 8.47%  | 8.71%  | 8.61%  | 6.85%  | 6.23%  | 5.80%  | 5.63%  | 6.05%  | 7.85%  | 8.35%  | 7.78%  | 6.25%  | 6.54%  |
| 2 CCS Categories                                    | <0.001 | -2.6% | -0.1% | 1.90%  | 1.86%  | 1.83%  | 1.64%  | 1.46%  | 1.37%  | 1.31%  | 1.30%  | 1.32%  | 1.27%  | 1.29%  | 1.27%  | 1.25%  |
| 3 CCS Categories                                    | <0.001 | -3.0% | -0.1% | 3.14%  | 3.23%  | 3.13%  | 2.82%  | 2.60%  | 2.45%  | 2.31%  | 2.16%  | 2.19%  | 1.97%  | 2.03%  | 2.01%  | 1.90%  |
| 4 CS Categories                                     | <0.001 | -3.1% | -0.2% | 5.06%  | 5.13%  | 4.99%  | 4.73%  | 4.62%  | 4.59%  | 4.13%  | 3.87%  | 3.72%  | 3.26%  | 3.26%  | 3.10%  | 2.99%  |
| 5 CCS Categories                                    | <0.001 | -2.5% | -0.1% | 5.77%  | 5.31%  | 5.20%  | 5.11%  | 5.00%  | 4.92%  | 4.78%  | 4.57%  | 4.51%  | 4.09%  | 4.25%  | 4.10%  | 3.89%  |
| 6 CCS Categories                                    | <0.001 | -2.5% | -0.2% | 6.17%  | 5.75%  | 5.62%  | 5.60%  | 5.59%  | 5.59%  | 5.31%  | 5.12%  | 5.01%  | 4.56%  | 4.58%  | 4.41%  | 4.14%  |
| 7 CCS Categories                                    | <0.001 | -2.0% | -0.1% | 6.21%  | 5.81%  | 5.82%  | 5.85%  | 5.78%  | 5.77%  | 5.67%  | 5.44%  | 5.30%  | 4.98%  | 5.02%  | 4.86%  | 4.59%  |
| 8 CCS Categories                                    | 0.003  | -1.5% | -0.1% | 5.97%  | 5.71%  | 5.47%  | 5.65%  | 5.69%  | 5.75%  | 5.66%  | 5.50%  | 5.31%  | 5.12%  | 5.13%  | 5.01%  | 4.80%  |
| 9 CCS Categories                                    | 0.011  | -1.3% | -0.1% | 5.74%  | 5.36%  | 5.28%  | 5.32%  | 5.43%  | 5.49%  | 5.54%  | 5.40%  | 5.26%  | 5.20%  | 5.13%  | 5.00%  | 4.78%  |



|                                       |         |        |        |              |               |               |               |               |               |               |               |               |               |               |               |               |
|---------------------------------------|---------|--------|--------|--------------|---------------|---------------|---------------|---------------|---------------|---------------|---------------|---------------|---------------|---------------|---------------|---------------|
| >=10 CCS Categories                   | <0.001  | 2.0%   | 1.0%   | 51.58%       | 53.13%        | 54.05%        | 56.41%        | 57.60%        | 58.28%        | 59.66%        | 60.59%        | 59.54%        | 61.18%        | 61.53%        | 63.99%        | 65.11%        |
| Mean (SD) CCS Categories              | <0.001  | 1.8%   | 0.225  | 12.29 (9.62) | 12.81 (10.26) | 13.05 (10.41) | 13.48 (10.40) | 13.68 (10.33) | 13.79 (10.31) | 14.03 (10.35) | 14.19 (10.43) | 13.96 (10.53) | 14.32 (10.73) | 14.37 (10.63) | 14.94 (10.73) | 15.21 (10.87) |
| Health Care Utilization               |         |        |        |              |               |               |               |               |               |               |               |               |               |               |               |               |
| Mean (SD) Ambulatory visits           | 0.230   | 0.2%   | 0.053  | 8.01 (6.66)  | 8.19 (7.02)   | 8.32 (7.18)   | 8.65 (7.23)   | 8.58 (7.06)   | 8.43 (6.91)   | 8.40 (6.89)   | 8.48 (7.05)   | 7.94 (6.87)   | 7.87 (6.90)   | 8.00 (6.90)   | 8.26 (6.94)   | 8.17 (6.90)   |
| Mean (SD) Emergency Department Visits | < 0.001 | 4.7%   | 0.019  | 0.41 (1.19)  | 0.47 (1.26)   | 0.51 (1.34)   | 0.53 (1.38)   | 0.52 (1.37)   | 0.54 (1.4)    | 0.54 (1.4)    | 0.55 (1.4)    | 0.56 (1.43)   | 0.57 (1.45)   | 0.65 (1.58)   | 0.66 (1.57)   | 0.66 (1.53)   |
| Mean (SD) Hospitalizations            | 0.002   | -1.1%  | -0.005 | 0.41 (0.87)  | 0.43 (0.94)   | 0.42 (0.93)   | 0.41 (0.93)   | 0.40 (0.92)   | 0.38 (0.91)   | 0.37 (0.90)   | 0.36 (0.87)   | 0.34 (0.84)   | 0.34 (0.83)   | 0.34 (0.84)   | 0.35 (0.85)   | 0.35 (0.85)   |
| HbA <sub>1c</sub>                     |         |        |        |              |               |               |               |               |               |               |               |               |               |               |               |               |
| Mean (SD) HbA <sub>1c</sub>           | 0.15    | -0.03% | -0.38% | 7.05 (1.31)  | 6.97 (1.26)   | 6.98 (1.29)   | 7.10 (1.34)   | 7.11 (1.34)   | 7.12 (1.39)   | 7.10 (1.38)   | 7.11 (1.38)   | 7.20 (1.44)   | 7.15 (1.40)   | 7.19 (1.44)   | 7.09 (1.41)   | 7.00 (1.40)   |
| HbA <sub>1c</sub> < 7.0%              | 0.35    | 0.33%  | 0.19%  | 58.2%        | 62.6%         | 62.2%         | 58.6%         | 57.7%         | 58.2%         | 59.1%         | 58.4%         | 55.5%         | 57.1%         | 56.2%         | 59.0%         | 60.7%         |
| HbA <sub>1c</sub> ≥ 8.0%              | 0.01    | 0.53%  | 0.09%  | 17.4%        | 14.9%         | 16.2%         | 18.1%         | 18.5%         | 18.8%         | 18.6%         | 19.2%         | 21.2%         | 20.0%         | 21.1%         | 19.4%         | 18.6%         |

# Supplemental Table S5. Confidence Intervals for Point Estimates for Commercial Cohort

Values represent upper and lower bounds of 95% confidence intervals around point estimates

| Year | Total Population | Age   |       | >= 10 CCS Categories |       | >= 10 med classes |       | >= 3 CV classes |       | >= 3 glucose classes |       | >= 1 lipid classes |       | >= 1 DCSI |       | Mean glucose classes |       |
|------|------------------|-------|-------|----------------------|-------|-------------------|-------|-----------------|-------|----------------------|-------|--------------------|-------|-----------|-------|----------------------|-------|
|      |                  | Lower | Upper | Lower                | Upper | Lower             | Upper | Lower           | Upper | Lower                | Upper | Lower              | Upper | Lower     | Upper | Lower                | Upper |
| 2006 | 393046           | 51.90 | 51.96 | 33.1%                | 33.4% | 12.5%             | 12.7% | 20.3%           | 20.5% | 11.5%                | 11.7% | 36.9%              | 37.2% | 33.2%     | 33.5% | 1.106                | 1.114 |
| 2007 | 436460           | 52.17 | 52.23 | 33.5%                | 33.8% | 19.0%             | 19.2% | 26.5%           | 26.7% | 16.3%                | 16.5% | 44.3%              | 44.6% | 32.4%     | 32.6% | 1.296                | 1.304 |
| 2008 | 451113           | 52.37 | 52.43 | 34.4%                | 34.6% | 23.6%             | 23.8% | 32.0%           | 32.3% | 18.0%                | 18.2% | 51.4%              | 51.7% | 31.9%     | 32.2% | 1.416                | 1.424 |
| 2009 | 460069           | 52.68 | 52.74 | 35.2%                | 35.4% | 24.7%             | 25.0% | 33.0%           | 33.3% | 18.1%                | 18.3% | 54.3%              | 54.6% | 31.8%     | 32.1% | 1.426                | 1.434 |
| 2010 | 456654           | 52.94 | 53.00 | 35.3%                | 35.6% | 25.2%             | 25.5% | 33.3%           | 33.5% | 18.1%                | 18.3% | 55.4%              | 55.7% | 31.6%     | 31.9% | 1.416                | 1.424 |
| 2011 | 459222           | 53.23 | 53.29 | 35.4%                | 35.7% | 25.2%             | 25.4% | 33.1%           | 33.4% | 17.9%                | 18.1% | 55.7%              | 56.0% | 31.2%     | 31.4% | 1.406                | 1.414 |
| 2012 | 452232           | 53.43 | 53.49 | 36.2%                | 36.5% | 24.5%             | 24.8% | 32.7%           | 33.0% | 17.1%                | 17.4% | 55.1%              | 55.4% | 30.9%     | 31.2% | 1.366                | 1.374 |
| 2013 | 445045           | 53.67 | 53.73 | 36.7%                | 37.0% | 24.2%             | 24.4% | 32.5%           | 32.7% | 17.1%                | 17.4% | 54.9%              | 55.2% | 31.2%     | 31.5% | 1.366                | 1.374 |
| 2014 | 400824           | 53.49 | 53.55 | 35.3%                | 35.6% | 23.5%             | 23.8% | 31.2%           | 31.5% | 18.0%                | 18.2% | 54.9%              | 55.2% | 30.5%     | 30.8% | 1.406                | 1.414 |
| 2015 | 412659           | 53.57 | 53.63 | 37.4%                | 37.7% | 23.6%             | 23.8% | 30.9%           | 31.2% | 18.9%                | 19.2% | 54.3%              | 54.6% | 31.8%     | 32.1% | 1.426                | 1.434 |
| 2016 | 432683           | 53.72 | 53.78 | 36.9%                | 37.2% | 24.0%             | 24.2% | 31.0%           | 31.3% | 19.7%                | 20.0% | 55.2%              | 55.5% | 31.5%     | 31.8% | 1.466                | 1.474 |
| 2017 | 440304           | 53.87 | 53.93 | 37.8%                | 38.1% | 24.7%             | 25.0% | 31.3%           | 31.6% | 20.6%                | 20.8% | 56.6%              | 56.9% | 31.6%     | 31.9% | 1.506                | 1.514 |
| 2018 | 386845           | 54.45 | 54.51 | 38.8%                | 39.1% | 26.7%             | 27.0% | 32.5%           | 32.8% | 22.9%                | 23.2% | 59.2%              | 59.5% | 32.7%     | 33.0% | 1.586                | 1.594 |

| Year | Mean CV classes |       | Mean lipid classes |       | # with lab results | HbA1c < 7 |       | HBA1 c >= 8 |       | Mean ambulatory |       | Mean inpatient |       | Mean ED |       |
|------|-----------------|-------|--------------------|-------|--------------------|-----------|-------|-------------|-------|-----------------|-------|----------------|-------|---------|-------|
|      | Lower           | Upper | Lower              | Upper |                    | Lower     | Upper | Lower       | Upper | Lower           | Upper | Lower          | Upper | Lower   | Upper |
| 2006 | 1.125           | 1.135 | 0.488              | 0.492 | 85397              | 48.6%     | 49.2% | 27.7%       | 28.3% | 6.841           | 6.879 | 0.189          | 0.193 | 0.257   | 0.263 |
| 2007 | 1.405           | 1.415 | 0.608              | 0.612 | 76577              | 53.0%     | 53.7% | 24.8%       | 25.4% | 6.772           | 6.808 | 0.179          | 0.182 | 0.257   | 0.263 |
| 2008 | 1.685           | 1.695 | 0.698              | 0.702 | 110196             | 52.7%     | 53.2% | 25.8%       | 26.3% | 6.712           | 6.748 | 0.170          | 0.174 | 0.257   | 0.263 |
| 2009 | 1.735           | 1.745 | 0.718              | 0.722 | 125917             | 49.9%     | 50.4% | 27.1%       | 27.6% | 6.732           | 6.768 | 0.165          | 0.169 | 0.257   | 0.263 |
| 2010 | 1.745           | 1.755 | 0.718              | 0.722 | 126572             | 49.0%     | 49.5% | 27.6%       | 28.1% | 6.602           | 6.638 | 0.159          | 0.162 | 0.257   | 0.263 |

|      |       |       |       |       |        |       |       |       |       |       |       |       |       |       |       |
|------|-------|-------|-------|-------|--------|-------|-------|-------|-------|-------|-------|-------|-------|-------|-------|
| 2011 | 1.745 | 1.755 | 0.708 | 0.712 | 119634 | 50.9% | 51.4% | 27.1% | 27.7% | 6.492 | 6.528 | 0.152 | 0.155 | 0.267 | 0.273 |
| 2012 | 1.725 | 1.735 | 0.678 | 0.682 | 115219 | 50.9% | 51.4% | 27.0% | 27.5% | 6.412 | 6.448 | 0.143 | 0.146 | 0.267 | 0.273 |
| 2013 | 1.715 | 1.725 | 0.658 | 0.662 | 135746 | 49.7% | 50.2% | 28.5% | 29.0% | 6.462 | 6.498 | 0.136 | 0.139 | 0.267 | 0.273 |
| 2014 | 1.665 | 1.675 | 0.648 | 0.652 | 124359 | 47.1% | 47.6% | 30.1% | 30.6% | 6.211 | 6.249 | 0.125 | 0.128 | 0.277 | 0.283 |
| 2015 | 1.655 | 1.665 | 0.628 | 0.632 | 134410 | 46.5% | 47.0% | 30.2% | 30.7% | 6.152 | 6.188 | 0.124 | 0.127 | 0.287 | 0.293 |
| 2016 | 1.675 | 1.685 | 0.628 | 0.632 | 151323 | 46.9% | 47.4% | 29.9% | 30.3% | 6.132 | 6.168 | 0.122 | 0.124 | 0.297 | 0.303 |
| 2017 | 1.695 | 1.705 | 0.638 | 0.642 | 155530 | 48.9% | 49.4% | 28.7% | 29.2% | 6.142 | 6.178 | 0.119 | 0.122 | 0.297 | 0.303 |
| 2018 | 1.764 | 1.776 | 0.668 | 0.672 | 127663 | 50.2% | 50.8% | 27.5% | 28.0% | 6.171 | 6.209 | 0.111 | 0.114 | 0.287 | 0.293 |

# Supplemental Table S6. Confidence Intervals for Point Estimates for Medicare Advantage Cohort

Values represent upper and lower bounds of 95% confidence intervals around point estimates

| Year | Total Population | Age   |       | >= 10 CCS Categories |       | >= 10 med classes |       | >= 3 CV classes |       | >= 3 glucose classes |       | >= 1 lipid classes |       | >= 1 DCSI |       | Mean glucose classes |       |
|------|------------------|-------|-------|----------------------|-------|-------------------|-------|-----------------|-------|----------------------|-------|--------------------|-------|-----------|-------|----------------------|-------|
|      |                  | Lower | Upper | Lower                | Upper | Lower             | Upper | Lower           | Upper | Lower                | Upper | Lower              | Upper | Lower     | Upper | Lower                | Upper |
| 2006 | 65583            | 70.06 | 70.16 | 51.2%                | 52.0% | 37.3%             | 38.0% | 53.8%           | 54.6% | 16.3%                | 16.9% | 52.3%              | 53.1% | 58.7%     | 59.5% | 1.482                | 1.498 |
| 2007 | 97816            | 70.57 | 70.67 | 52.8%                | 53.4% | 41.0%             | 41.6% | 53.1%           | 53.7% | 17.1%                | 17.6% | 55.1%              | 55.8% | 59.1%     | 59.7% | 1.433                | 1.447 |
| 2008 | 133230           | 70.65 | 70.73 | 53.8%                | 54.3% | 40.6%             | 41.1% | 52.5%           | 53.1% | 16.2%                | 16.6% | 57.4%              | 57.9% | 59.0%     | 59.5% | 1.384                | 1.396 |
| 2009 | 184439           | 70.56 | 70.64 | 56.2%                | 56.6% | 41.9%             | 42.3% | 53.1%           | 53.5% | 16.1%                | 16.4% | 60.7%              | 61.2% | 59.8%     | 60.2% | 1.375                | 1.385 |
| 2010 | 242461           | 70.85 | 70.91 | 57.4%                | 57.8% | 43.4%             | 43.8% | 53.6%           | 54.0% | 16.2%                | 16.5% | 63.3%              | 63.7% | 60.0%     | 60.4% | 1.375                | 1.385 |
| 2011 | 291044           | 71.01 | 71.07 | 58.1%                | 58.5% | 44.5%             | 44.8% | 53.7%           | 54.1% | 15.6%                | 15.8% | 65.1%              | 65.4% | 59.8%     | 60.2% | 1.356                | 1.364 |
| 2012 | 363848           | 71.26 | 71.32 | 59.5%                | 59.8% | 43.5%             | 43.8% | 52.9%           | 53.2% | 15.0%                | 15.2% | 65.8%              | 66.1% | 60.2%     | 60.5% | 1.336                | 1.344 |
| 2013 | 410773           | 71.48 | 71.54 | 60.4%                | 60.7% | 43.8%             | 44.1% | 53.0%           | 53.3% | 14.9%                | 15.1% | 66.6%              | 66.9% | 60.5%     | 60.8% | 1.317                | 1.323 |
| 2014 | 431868           | 71.79 | 71.85 | 59.4%                | 59.7% | 43.7%             | 44.0% | 52.2%           | 52.5% | 15.5%                | 15.7% | 67.4%              | 67.7% | 59.9%     | 60.2% | 1.337                | 1.343 |
| 2015 | 465814           | 72.17 | 72.23 | 61.0%                | 61.3% | 42.4%             | 42.7% | 51.2%           | 51.5% | 15.3%                | 15.5% | 67.7%              | 68.0% | 60.9%     | 61.1% | 1.317                | 1.323 |
| 2016 | 656531           | 71.65 | 71.69 | 61.4%                | 61.6% | 44.3%             | 44.5% | 52.1%           | 52.4% | 16.5%                | 16.7% | 69.0%              | 69.3% | 61.6%     | 61.8% | 1.377                | 1.383 |
| 2017 | 819285           | 71.88 | 71.92 | 63.9%                | 64.1% | 45.8%             | 46.1% | 52.2%           | 52.4% | 17.1%                | 17.2% | 70.4%              | 70.6% | 63.7%     | 63.9% | 1.387                | 1.393 |
| 2018 | 797151           | 72.62 | 72.66 | 65.0%                | 65.2% | 48.4%             | 48.6% | 53.8%           | 54.0% | 18.0%                | 18.2% | 73.1%              | 73.3% | 65.0%     | 65.2% | 1.417                | 1.423 |

| Mean CV classes |       | Mean lipid classes |       | # with lab results | HbA1c < 7 |       | HBA1c >= 8 |       | Mean ambulatory |       | Mean inpatient |       | Mean ED |       |
|-----------------|-------|--------------------|-------|--------------------|-----------|-------|------------|-------|-----------------|-------|----------------|-------|---------|-------|
| Lower           | Upper | Lower              | Upper |                    | Lower     | Upper | Lower      | Upper | Lower           | Upper | Lower          | Upper | Lower   | Upper |
| 2.695           | 2.725 | 0.635              | 0.645 | 11174              | 57.3%     | 59.1% | 16.7%      | 18.1% | 7.959           | 8.061 | 0.401          | 0.414 | 0.401   | 0.419 |
| 2.687           | 2.713 | 0.695              | 0.705 | 13886              | 61.8%     | 63.4% | 14.3%      | 15.5% | 8.146           | 8.234 | 0.424          | 0.436 | 0.462   | 0.478 |
| 2.669           | 2.691 | 0.716              | 0.724 | 23010              | 61.5%     | 62.8% | 15.7%      | 16.7% | 8.281           | 8.359 | 0.416          | 0.426 | 0.503   | 0.517 |
| 2.711           | 2.729 | 0.737              | 0.743 | 35007              | 58.0%     | 59.1% | 17.7%      | 18.5% | 8.617           | 8.683 | 0.406          | 0.414 | 0.524   | 0.536 |
| 2.742           | 2.758 | 0.767              | 0.773 | 44782              | 57.3%     | 58.2% | 18.1%      | 18.8% | 8.552           | 8.608 | 0.391          | 0.399 | 0.515   | 0.525 |
| 2.743           | 2.757 | 0.778              | 0.782 | 48910              | 57.7%     | 58.6% | 18.4%      | 19.1% | 8.405           | 8.455 | 0.380          | 0.387 | 0.535   | 0.545 |

|       |       |       |       |        |       |       |       |       |       |       |       |       |       |       |
|-------|-------|-------|-------|--------|-------|-------|-------|-------|-------|-------|-------|-------|-------|-------|
| 2.714 | 2.726 | 0.778 | 0.782 | 72013  | 58.7% | 59.4% | 18.3% | 18.9% | 8.378 | 8.422 | 0.371 | 0.376 | 0.535 | 0.545 |
| 2.724 | 2.736 | 0.778 | 0.782 | 116709 | 58.2% | 58.7% | 19.0% | 19.4% | 8.458 | 8.502 | 0.357 | 0.363 | 0.546 | 0.554 |
| 2.694 | 2.706 | 0.778 | 0.782 | 121450 | 55.3% | 55.8% | 21.0% | 21.4% | 7.920 | 7.960 | 0.339 | 0.344 | 0.556 | 0.564 |
| 2.644 | 2.656 | 0.768 | 0.772 | 144427 | 56.8% | 57.3% | 19.8% | 20.2% | 7.850 | 7.890 | 0.333 | 0.338 | 0.566 | 0.574 |
| 2.695 | 2.705 | 0.779 | 0.781 | 205118 | 55.9% | 56.4% | 20.9% | 21.2% | 7.983 | 8.017 | 0.338 | 0.342 | 0.646 | 0.654 |
| 2.706 | 2.714 | 0.799 | 0.801 | 276675 | 58.9% | 59.2% | 19.3% | 19.6% | 8.245 | 8.275 | 0.344 | 0.348 | 0.657 | 0.663 |
| 2.786 | 2.794 | 0.829 | 0.831 | 261998 | 60.5% | 60.9% | 18.4% | 18.7% | 8.155 | 8.185 | 0.344 | 0.347 | 0.657 | 0.663 |
